# Supplementary material for: High-Content Assays for Characterizing the Viability and Morphology of 3D Cancer Spheroid Cultures
Source: PubMed Central journal article supplement — Assay Drug Dev Technol. 2015 Sep 1;13(7):402–14. doi: 10.1089/adt.2015.655 (PMC4556086; doi:10.1089/adt.2015.655), 2015-09-01
Supplement: Supp_Fig1.pdf [file Supp_Fig1.pdf]

## SUPPLEMENTARY DATA

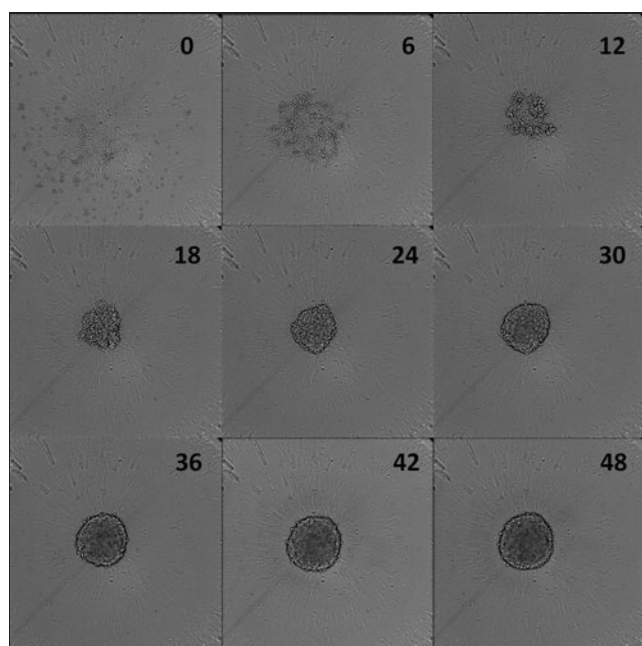

**Supplementary Fig. S1.** Time course of spheroid formation. HCT116 cells were seeded into 96-well U-shaped Corning plates, and then time-lapse images were acquired every 6 h over the period of 48 h in transmitted light with the use of environmental control unit.
