# Supplementary material for: High-Content Assays for Characterizing the Viability and Morphology of 3D Cancer Spheroid Cultures
Source: PubMed Central journal article supplement — Assay Drug Dev Technol. 2015 Sep 1;13(7):402–14. doi: 10.1089/adt.2015.655 (PMC4556086; doi:10.1089/adt.2015.655), 2015-09-01
Supplement: Supp_Fig2.pdf [file Supp_Fig2.pdf]

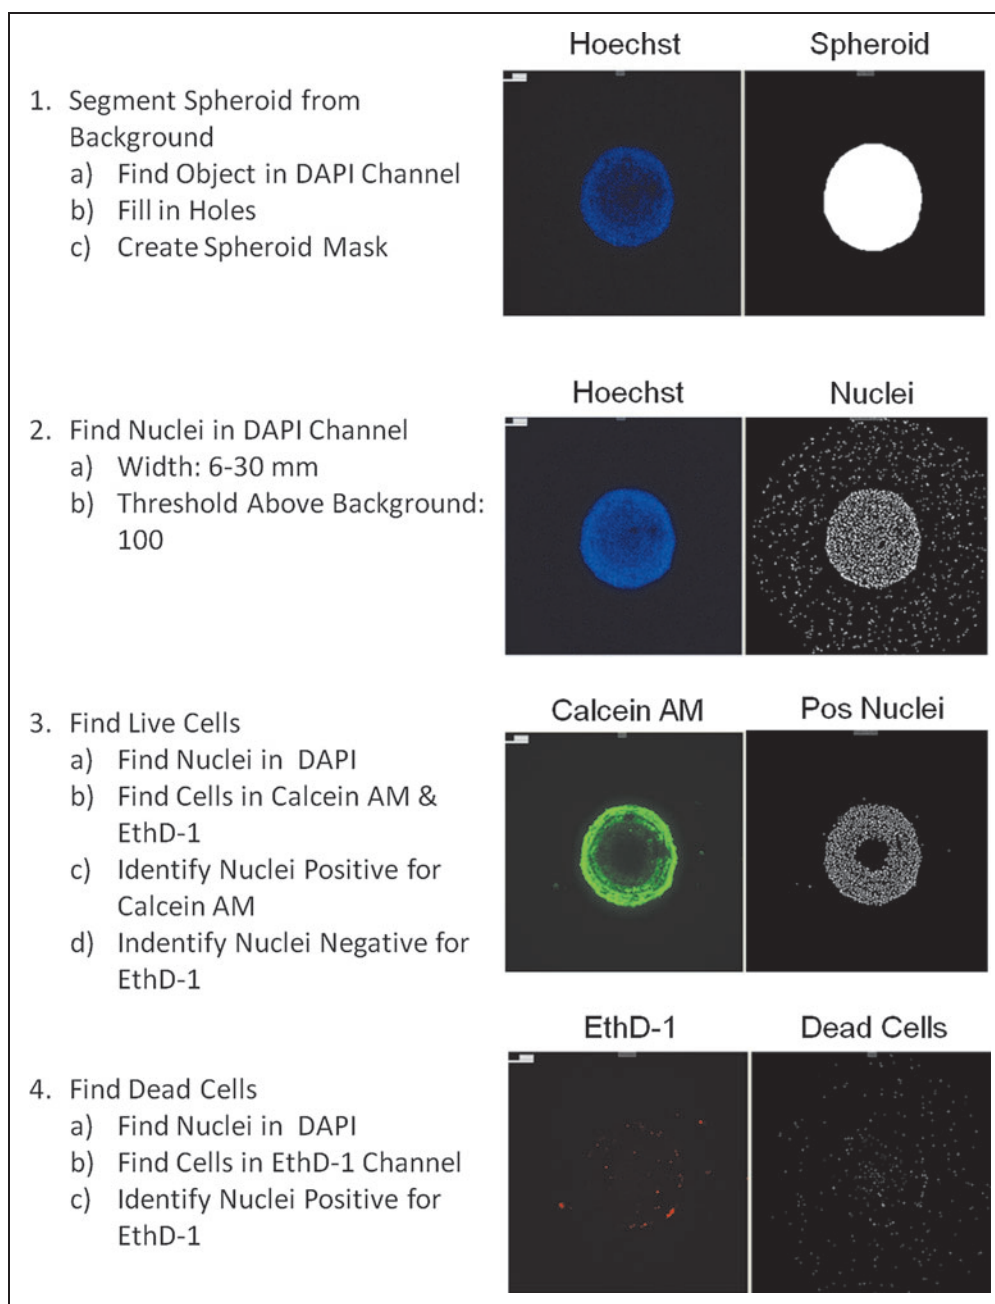

**Supplementary Fig. S2.** MetaXpress Custom Module Editor spheroid analysis workflow and images of the different channels and masks created during the analysis process. Spheroid mask was applied to the nuclei count, calcein AM-positive nuclei, and Dead cell count.
