# Supplementary material for: High-Content Assays for Characterizing the Viability and Morphology of 3D Cancer Spheroid Cultures
Source: PubMed Central journal article supplement — Assay Drug Dev Technol. 2015 Sep 1;13(7):402–14. doi: 10.1089/adt.2015.655 (PMC4556086; doi:10.1089/adt.2015.655), 2015-09-01
Supplement: Supp_Table1.pdf [file Supp_Table1.pdf]

**Supplementary Table S1. Image Acquisition Parameters for Various Dyes**

| Dye         | Filter cube | Bandpass (nm) |          | Exposure time (ms) |          |
|-------------|-------------|---------------|----------|--------------------|----------|
|             |             | Excitation    | Emission | Widefield          | Confocal |
| Hoechst     | DAPI        | 377/50        | 447/60   | 20                 | 500      |
| Calcein AM  | FITC        | 482/35        | 536/40   | 2                  | 40       |
| EthD-1      | Texas Red   | 560/25        | 632/22   | 30                 | 500      |
| Caspase 3/7 | FITC        | 482/35        | 536/40   | 20                 | 200      |
