# Supplementary material for: High-Content Assays for Characterizing the Viability and Morphology of 3D Cancer Spheroid Cultures
Source: PubMed Central journal article supplement — Assay Drug Dev Technol. 2015 Sep 1;13(7):402–14. doi: 10.1089/adt.2015.655 (PMC4556086; doi:10.1089/adt.2015.655), 2015-09-01
Supplement: Supp_Table2.pdf [file Supp_Table2.pdf]

**Supplementary Table S2. Z'-Values Calculated from Figure 5**

|                                                 | Paclitaxel | Etoposide | Staurosporine | Mitomycin C | Doxorubicin | Fluoroadenine |
|-------------------------------------------------|------------|-----------|---------------|-------------|-------------|---------------|
| All cells                                       | -0.20      | 0.82      | 0.69          | 0.82        | 0.70        | 0.80          |
| Calcein AM-Pos (Live)                           | 0.70       | 0.75      | 0.76          | 0.80        | 0.68        | 0.71          |
| EthD-1-Neg (Live)                               | 0.70       | 0.84      | 0.83          | 0.86        | 0.73        | 0.82          |
| Avg spheroid diameter (mm)                      | -0.86      | 0.74      | 0.44          | 0.79        | 0.59        | 0.76          |
| Avg spheroid area (mm <sup>2</sup> )            | 0.33       | 0.87      | 0.75          | 0.86        | 0.75        | 0.86          |
| Avg total area of live cells (mm <sup>2</sup> ) | 0.66       | 0.60      | 0.68          | 0.70        | 0.57        | 0.59          |
| Calcein AM Avg intensity                        | 0.70       | 0.75      | 0.76          | 0.80        | 0.68        | 0.71          |

Avg, average; Pos, positive; Neg, negative.
