# Supplementary material for: High-Content Assays for Characterizing the Viability and Morphology of 3D Cancer Spheroid Cultures
Source: PubMed Central journal article supplement — Assay Drug Dev Technol. 2015 Sep 1;13(7):402–14. doi: 10.1089/adt.2015.655 (PMC4556086; doi:10.1089/adt.2015.655), 2015-09-01
Supplement: Supp_Table3.pdf [file Supp_Table3.pdf]

**Supplementary Table S3. Results from Screening a Library of 119 Anticancer Drugs and 20 Controls**

| Rank                                        | Compound name                      | IC <sub>50</sub> (nM) | Calcein AM-Pos cells (10 μM) |    |
|---------------------------------------------|------------------------------------|-----------------------|------------------------------|----|
|                                             |                                    |                       | Avg                          | SD |
|                                             | DMSO control, 0.1% in media (n=50) |                       | 1000                         | 79 |
| Effect shown at all tested concentrations   |                                    |                       |                              |    |
| 1                                           | Trametinib                         | <1                    | 171                          | 3  |
| 2                                           | Paclitaxel                         | <1                    | 190                          | 99 |
| 3                                           | Docetaxel                          | <1                    | 289                          | 56 |
| 4                                           | Cabazitaxel                        | <1                    | 327                          | 9  |
| 5                                           | Dactinomycin                       | <1                    | 328                          | 41 |
| 6                                           | Vincristine sulfate                | <1                    | 715                          | 65 |
| 7                                           | Vinblastine sulfate                | <1                    | 759                          | 25 |
| Concentration Response with 4-parameter Fit |                                    |                       |                              |    |
| 8                                           | Ixabepilone                        | 0.198                 | 177                          | 88 |
| 9                                           | Enzalutamide                       | 0.34                  | 181                          | 15 |
| 10                                          | Romidepsin                         | 0.35                  | 431                          | 1  |
| 11                                          | Topotecan hydrochloride            | 2.15                  | 147                          | 33 |
| 12                                          | Carfilzomib                        | 2.15                  | 620                          | 14 |
| 13                                          | Daunorubicin hydrochloride         | 2.72                  | 249                          | 15 |
| 14                                          | Bortezomib                         | 2.82                  | 551                          | 33 |
| 15                                          | Imatinib                           | 4.19                  | 40                           | 25 |
| 16                                          | Omacetaxine mepesuccinate          | 5.69                  | 581                          | 1  |
| 17                                          | Doxorubicin hydrochloride          | 6.53                  | 209                          | 77 |
| 18                                          | Mitomycin                          | 6.76                  | 150                          | 12 |
| 19                                          | Gemcitabine hydrochloride          | 9.31                  | 96                           | 21 |
| 20                                          | Clofarabine                        | 10.14                 | 128                          | 23 |
| 21                                          | Decitabine                         | 10.4                  | 646                          | 16 |
| 22                                          | Epirubicin hydrochloride           | 11.3                  | 141                          | 21 |
| 23                                          | Vinorelbine tartrate               | 13.1                  | 631                          | 53 |
| 24                                          | Plicamycin                         | 13.7                  | 350                          | 1  |
| 25                                          | Teniposide                         | 16.6                  | 165                          | 11 |
| 26                                          | Mitoxantrone                       | 18.3                  | 135                          | 25 |
| 27                                          | Methotrexate                       | 34.2                  | 313                          | 8  |
| 28                                          | Floxuridine                        | 42.5                  | 229                          | 25 |

*(continued)*

Supplementary Table S3. (Continued)

| Rank                                 | Compound name                 | IC <sub>50</sub> (nM) | Calcein AM-Pos cells (10 μM) |     |
|--------------------------------------|-------------------------------|-----------------------|------------------------------|-----|
|                                      |                               |                       | Avg                          | SD  |
| 29                                   | Cytarabine hydrochloride      | 46.9                  | 120                          | 17  |
| 30                                   | Vorinostat                    | 50.6                  | 311                          | 111 |
| 31                                   | Belinostat                    | 51.9                  | 435                          | 20  |
| 32                                   | Bleomycin sulfate             | 79.6                  | 101                          | 75  |
| 33                                   | Valrubicin                    | 84.6                  | 4                            | 1   |
| 34                                   | Cladribine                    | 89.3                  | 68                           | 50  |
| 35                                   | Sorafenib                     | 110                   | 324                          | 243 |
| 36                                   | Axitinib                      | 162                   | 277                          | 3   |
| 37                                   | Triethylenemelamine           | 179                   | 148                          | 25  |
| 38                                   | Etoposide                     | 190                   | 132                          | 28  |
| 39                                   | Pemetrexed disodium salt      | 222                   | 419                          | 18  |
| 40                                   | Crizotinib                    | 244                   | 183                          | 38  |
| 41                                   | Oxaliplatin                   | 253                   | 180                          | 4   |
| 42                                   | Irinotecan hydrochloride      | 388                   | 61                           | 72  |
| 43                                   | Ponatinib                     | 418                   | 133                          | 30  |
| 44                                   | Fluorouracil                  | 446                   | 282                          | 17  |
| 45                                   | Fludarabine phosphate         | 992                   | 171                          | 99  |
| Effect only at highest concentration |                               |                       |                              |     |
| 46                                   | Pazopanib hydrochloride       | >1,000                | 110                          | 13  |
| 47                                   | Ceritinib                     | >1,000                | 118                          | 123 |
| 48                                   | Mechlorethamine hydrochloride | >1,000                | 126                          | 12  |
| 49                                   | Sunitinib                     | >1,000                | 145                          | 121 |
| 50                                   | Bosutinib                     | >1,000                | 147                          | 41  |
| 51                                   | Melphalan hydrochloride       | >1,000                | 200                          | 8   |
| 52                                   | Cabozantinib                  | >1,000                | 216                          | 40  |
| 53                                   | Thiotepa                      | >1,000                | 217                          | 18  |
| 54                                   | Uracil mustard                | >1,000                | 241                          | 25  |
| 55                                   | Thioguanine                   | >1,000                | 245                          | 45  |
| 56                                   | Vandetanib                    | >1,000                | 248                          | 137 |
| 57                                   | Pipobroman                    | >1,000                | 280                          | 33  |
| 58                                   | Azacitidine                   | >1,000                | 285                          | 251 |
| 59                                   | Afatinib                      | >1,000                | 291                          | 83  |

(continued)

Supplementary Table S3. (Continued)

| Rank                                            | Compound name            | IC <sub>50</sub> (nM) | Calcein AM-Pos cells (10 μM) |     |
|-------------------------------------------------|--------------------------|-----------------------|------------------------------|-----|
|                                                 |                          |                       | Avg                          | SD  |
| 60                                              | Mercaptopurine           | >1,000                | 356                          | 9   |
| 61                                              | Dabrafenib mesylate      | >1,000                | 363                          | 11  |
| 62                                              | Olaparib                 | >1,000                | 384                          | 62  |
| 63                                              | Chlorambucil             | >1,000                | 459                          | 245 |
| 64                                              | Dacarbazine              | >1,000                | 472                          | 262 |
| 65                                              | Temsirolimus             | >1,000                | 483                          | 117 |
| 66                                              | Dexrazoxane              | >1,000                | 490                          | 25  |
| 67                                              | Erlotinib hydrochloride  | >1,000                | 528                          | 243 |
| 68                                              | Mitotane                 | >1,000                | 459                          | 294 |
| 69                                              | Pralatrexate             | >1,000                | 583                          | 21  |
| 70                                              | Capecitabine             | >1,000                | 584                          | 58  |
| 71                                              | Everolimus               | >1,000                | 604                          | 155 |
| 72                                              | Nilotinib                | >1,000                | 644                          | 72  |
| 73                                              | Carboplatin              | >1,000                | 656                          | 25  |
| 74                                              | Streptozocin             | >1,000                | 742                          | 334 |
| No significant change (<3 SD) from DMSO control |                          |                       |                              |     |
| 75                                              | Sirolimus                | No effect             | 769.5*                       | 37  |
| 76                                              | Tretinoin                | No effect             | 780*                         | 58  |
| 77                                              | Busulfan                 | No effect             | 788*                         | 17  |
| 78                                              | Regorafenib              | No effect             | 808.5*                       | 32  |
| 79                                              | Exemestane               | No effect             | 852                          | 9   |
| 80                                              | Plerixafor               | No effect             | 870                          | 22  |
| 81                                              | Idelalisib               | No effect             | 918                          | 5   |
| 82                                              | Lapatinib                | No effect             | 937                          | 17  |
| 83                                              | Zoledronic acid          | No effect             | 942                          | 19  |
| 84                                              | Idarubicin hydrochloride | No effect             | 968                          | 13  |
| 85                                              | Altretamine              | No effect             | 973                          | 38  |
| 86                                              | Gefitinib                | No effect             | 974                          | 115 |
| 87                                              | Tamoxifen citrate        | No effect             | 980                          | 24  |
| 88                                              | Hydroxyurea              | No effect             | 987                          | 4   |
| 89                                              | Cisplatin                | No effect             | 991                          | 18  |
| 90                                              | Megestrol acetate        | No effect             | 992                          | 20  |

(continued)

Supplementary Table S3. (Continued)

| Rank | Compound name                     | IC <sub>50</sub> (nM) | Calcein AM-Pos cells (10 μM) |     |
|------|-----------------------------------|-----------------------|------------------------------|-----|
|      |                                   |                       | Avg                          | SD  |
| 91   | Aminolevulinic acid hydrochloride | No effect             | 1,004                        | 26  |
| 92   | Arsenic trioxide                  | No effect             | 1,005                        | 53  |
| 93   | Celecoxib                         | No effect             | 1,013                        | 4   |
| 94   | Lomustine                         | No effect             | 1,020                        | 87  |
| 95   | Pomalidomide                      | No effect             | 1,022                        | 25  |
| 96   | Carmustine                        | No effect             | 1,023                        | 33  |
| 97   | Ifosfamide                        | No effect             | 1,031                        | 14  |
| 98   | Bendamustine hydrochloride        | No effect             | 1,036                        | 113 |
| 99   | Lenalidomide                      | No effect             | 1,041                        | 82  |
| 100  | Temozolomide                      | No effect             | 1,044                        | 13  |
| 101  | Abiraterone                       | No effect             | 1,044                        | 18  |
| 102  | Cyclophosphamide                  | No effect             | 1,047                        | 2   |
| 103  | Vemurafenib                       | No effect             | 1,049                        | 91  |
| 104  | Fulvestrant                       | No effect             | 1,054                        | 4   |
| 105  | Methoxsalen                       | No effect             | 1,055                        | 49  |
| 106  | Estramustine phosphate sodium     | No effect             | 1,057                        | 15  |
| 107  | Raloxifene                        | No effect             | 1,061                        | 23  |
| 108  | Allopurinol                       | No effect             | 1,067                        | 21  |
| 109  | Thalidomide                       | No effect             | 1,073                        | 42  |
| 110  | Amifostine                        | No effect             | 1,078                        | 58  |
| 111  | Ibrutinib                         | No effect             | 1,089                        |     |
| 112  | Letrozole                         | No effect             | 1,095                        | 25  |
| 113  | Nelarabine                        | No effect             | 1,098                        | 8   |
| 114  | Dasatinib                         | No effect             | 1,107                        | 37  |
| 115  | Procarbazine hydrochloride        | No effect             | 1,121                        | 4   |
| 116  | Pentostatin                       | No effect             | 1,136                        | 82  |
| 117  | Anastrozole                       | No effect             | 1,173                        | 58  |
| 118  | Vismodegib                        | No effect             | 1,185                        | 21  |
| 119  | Imiquimod                         | No effect             | 1,290                        | 86  |
| 120  | None                              | No effect             | 930                          | 55  |

\*>2 SD compound effects evaluated based on number of calcein AM-positive cells in spheroids. Seventy-four compounds showed significant decrease (>3 SD from DMSO control) in the number of calcein AM-positive cells at 10 μM concentration. Compounds are ranked by (1)IC<sub>50</sub> Value and (2)Number of Calcein AM-Pos Cells (10 μM).
